# Supplementary material
Source: Springer Nature journal article supplement (https://www.springermedizin.de/resource/supplementary/12884_2008_216_MOESM2_ESM.pdf/9459862)

■ 0-6 ■ 7-8 □ 9-10

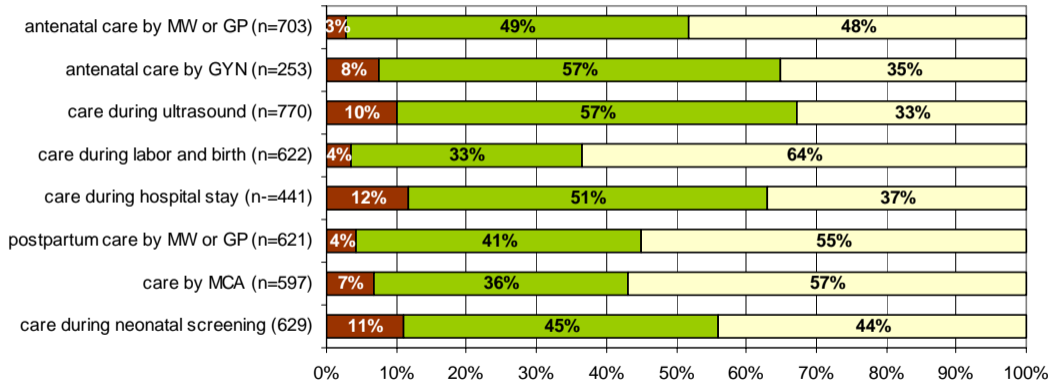

Supplement: MOESM2 [file 9459862]
